# Supplementary material for: Carbazole-based N4-donor Schiff base macrocycles: obtained metal free and as Cu(ii) and Ni(ii) complexes
Source: Royal Society of Chemistry journal article supplement (doi:10.1039/c6dt04598g), 2017-01-01
Supplement: c6dt04598g1.pdf [file c6dt04598g1.pdf]

## Carbazole-based N<sub>4</sub>-donor Schiff base macrocycles: obtained metal free and as Cu(II) and Ni(II) complexes

Stuart J. Malthus, Rajni K. Wilson, A. Vikas Aggarwal, Scott A. Cameron, David S. Larsen and Sally Brooker\*

### ELECTRONIC SUPPORTING INFORMATION

#### Experimental

##### General Details

<sup>1</sup>H and <sup>13</sup>C NMR spectra were recorded at 25 °C on a Varian 400 MHz Inova spectrometer. Infrared spectra were obtained on a Perkin Elmer Spectrum BX FT-IR System as pressed KBr discs. MS spectra were collected on a Bruker MicroTOF-Q spectrometer. UV-vis spectra were obtained on a Varian 500 Scan UV-vis-NIR spectrophotometer. All cyclic voltammetry experiments were carried out on solutions containing 1 mmolL<sup>-1</sup> compound and 0.1 mmolL<sup>-1</sup> TBAPF<sub>6</sub> electrolyte. The complexes were run in dry, distilled (over CaH<sub>2</sub>) MeCN in a three-compartment three-electrode cell (25 mL working volume), using a platinum working electrode (1 mm diameter) connected to a 0.01 molL<sup>-1</sup> AgNO<sub>3</sub> reference electrode and a platinum plate serving as a counter electrode. Measurements were recorded with an IviumStat XRe unit at room temperature. The working electrode surface was cleaned using 0.015 mm alumina, washed with water and dried before every scan. The working volume was degassed by passing a stream of Ar through it for 15 min prior to the measurements and then maintaining an inert atmosphere of Ar over the solution during the measurements. Elemental analyses were carried out by the Campbell Microanalytical Laboratory at the University of Otago.

X-Ray crystallographic data for [CuL<sup>tBu</sup>(H<sub>2</sub>O)]OAc·0.5(Ether) was collected on a Bruker Kappa Apex II area detector diffractometer at 83 K using graphite monochromated Cu-K $\alpha$  radiation ( $\lambda = 0.71073 \text{ \AA}$ ). The data sets were absorption corrected using SCALE. Structures were solved using direct or Patterson methods and refined against all F<sup>2</sup> data using SHELXL-97<sup>1</sup> with all non-hydrogen atoms anisotropic (Table S1). One of the two <sup>t</sup>Bu groups was rotationally disordered about the C23-C31 bond (C32-C34:C35-C37 0.75:0.25 occupancy) so EADP C32 C35, EADP C33 C36, and EADP C34 C37, were used to make the thermal parameters for these pairs of 'opposite C atoms' equal. The oxygen atom (O52) of the half occupancy diethylether (C50-C51-O52-O53A-C50A) was located on a centre of inversion, and the attached C atom was disordered 50:50 across C51 and C53A; EADP and EXYZ on the terminal C atoms, C50 and C50A, ensured that they shared the same coordinates and thermal parameters. Hydrogen atoms were inserted at calculated positions and rode on the atoms to which they were attached, with U(H) = 1.2 U(attached atom), except for those on the amine (N3) and water (O1) atoms for which the hydrogen atoms were located from difference maps and allowed to freely refine (both coordinates and U<sub>iso</sub>).

X-Ray crystallographic data for [NiL<sup>H</sup>]OAc-EtOH was collected on an Oxford Diffraction SuperNova diffractometer with an Atlas CCD, equipped with a Cryostream N<sub>2</sub> open-flow cooling device, using mirror monochromated microfocus Cu K $\alpha$  radiation at 100 K. Scans were performed in such a way as to collect a complete set of unique reflections to a maximum resolution of 0.80 Å. Raw frame data (including data reduction, interframe scaling, unit cell refinement, and absorption corrections) were processed using CrysAlis Pro.<sup>2</sup> Structures were solved using SUPERFLIP<sup>3</sup> and refined against all F<sup>2</sup> data using SHELXL-2014.<sup>4</sup> Hydrogen atoms were inserted at calculated positions and rode on the atoms to which they were attached, with U(H) = 1.2 U(attached atom). The lower half of the complex was disordered over two sites 0.65:0.35 occupancy for (Ni1-N2-C14-C15-N3-C16-C17) : (Ni1B-N102-C114-C115-N103-C116-C117). The lower occupancy sites were all refined isotropically, except C117 which shared to same position as C17 (EADP and EXYZ used to ensure they had the same coordinates and thermal parameters) and was refined anisotropically; N2 was also refined isotropically. Both the acetate anion and the ethanol molecule are disordered. The acetate anion is split into two parts 0.65:0.35 occupancy (C51-C50-O50-O51) : (C151-C150-O150-O151), with all atoms anisotropic (ISOR applied to the 0.35 occupancy atoms O150 C150), that share a methyl carbon atom = C51/C151 (EADP and EXYZ to ensure they have the same coordinates and thermal parameters). The ethanol molecule is two sites for the oxygen atom O60:O160 with 0.65:0.35 occupancy; all atoms anisotropic in order to add H-atoms the full occupancy CH<sub>2</sub> group was split into C60/C160 (EADP and EXYZ to ensure they have the same coordinates and thermal parameters) 0.65:0.35 occupancy. Hydrogen atoms were inserted at calculated positions and rode on the atoms to which they were attached, with U(H) = 1.2 U(attached atom).

Crystallographic data for the structures have been deposited with the Cambridge Crystallographic Data Centre, CCDC 1520894-1520895.

## Organic synthesis

### 1,8-Diformyl-3,6-di-tert-butyl-9H-carbazole (1<sup>tBu</sup>)

Prepared from 1,8-dibromo-3,6-di-tert-butyl-9H-carbazole,<sup>5-6</sup> according to the method described by Gibson and co-workers.<sup>6</sup> A solution of 1,8-dibromo-3,6-di-tert-butyl-9H-carbazole (2.50 g, 5.7 mmol) in degassed dry THF (125 mL) was cooled to 0 °C and n-BuLi (1.6 M solution in pentane: 3.87 mL, 6.2 mmol) was added. It was stirred for 1 h at this temperature. Then the reaction mixture was allowed to warm to room temperature while bubbling CO<sub>2</sub> (dried by passing through a CaCl<sub>2</sub> filled wash bottle) through the solution for 25 min. During this the colour changed from yellow to green. The solvent was then removed on a rotary evaporator, refilling the flask with argon. The dark orange residue was taken up again in dry degassed THF (125 mL), cooled to -78 °C and t-BuLi (1.5 M in hexane: 16.68 mL, 25.0 mmol) was added. This stirred solution was allowed to warm to 0 °C over 2hrs, after which it was cooled again to -78 °C. Dimethylformamide (2.01 g, 2.22 mL, 28.6 mmol) was added and then the mixture was allowed to warm up to room temperature while stirring

overnight. On addition of the DMF a white-orange precipitate formed immediately which dissolved again overnight. After 16 hrs the clear dark red solution was hydrolysed at 0 °C by addition of 1M HCl (22 mL) and was then diluted with ethyl acetate (150 mL). The organic phase was washed with 1 M aqueous NaOH (3 x 150 mL), 1M NaHCO<sub>3</sub> (2 x 150 mL) solutions and water (2 x 150 mL). The aqueous phases were re-extracted with 200 mL ethyl acetate, then the combined organic phases were dried over MgSO<sub>4</sub>, filtered and the solvent removed. The resulting dark oily material was filtered through SiO<sub>2</sub> using a mixture of hexane and ethyl acetate (hexane : ethyl acetate = 8:1) as the eluting solvent. The filtered material was recrystallised from hot hexane, yielding **1<sup>tBu</sup>** as a yellow crystalline material (0.76 g, 40.0%). R<sub>F</sub> (hexane/EtOAc 5:1) = 0.68. <sup>1</sup>H-NMR (500 MHz, CDCl<sub>3</sub>): δ (ppm) 1.52 (s, 18H, H3b), 7.94 (d, 4J(H2H4)= 1.8 Hz, 2H, H2), 8.40 (d, 4J(H4H2)= 1.8 Hz, 2H, H4), 10.24 (s, 2H, H10), 11.45 (br. s, NH). <sup>13</sup>C NMR (125 MHz, CDCl<sub>3</sub>): δ (ppm) 31.96 (C3b), 34.90 (C3a), 120.1 (Ar-C), 123.5 (Ar-C4), 123.6 (Ar-C), 129.5 (Ar-C2), 143.2 (Ar-C3), 193.0 (Ar-C10), 142.3 (Ar-C3). IR (KBr): 3429 (s, (N-H)), 2954 (s, [C(CH<sub>2</sub>-H)<sub>3</sub>]), 2880 (d, (CH<sub>2</sub>-H)), 2806 (d, (OC-H)), 2724 (s, (OC-H)), 1680 (s, (C=O)), 1592, 1482 (s, (C=C)), 1394, 1366 (s, δ(t-Bu CH<sub>3</sub>)). ESI (-) MS (m/z): (C<sub>22</sub>H<sub>24</sub>NO<sub>2</sub>)<sup>-</sup> expected 334.19, found 334. Microanalysis; calc. for C<sub>22</sub>H<sub>25</sub>O<sub>2</sub>N: C, 78.77; H, 7.51; N, 4.18; found: C, 78.82; H, 7.77; N, 4.22.

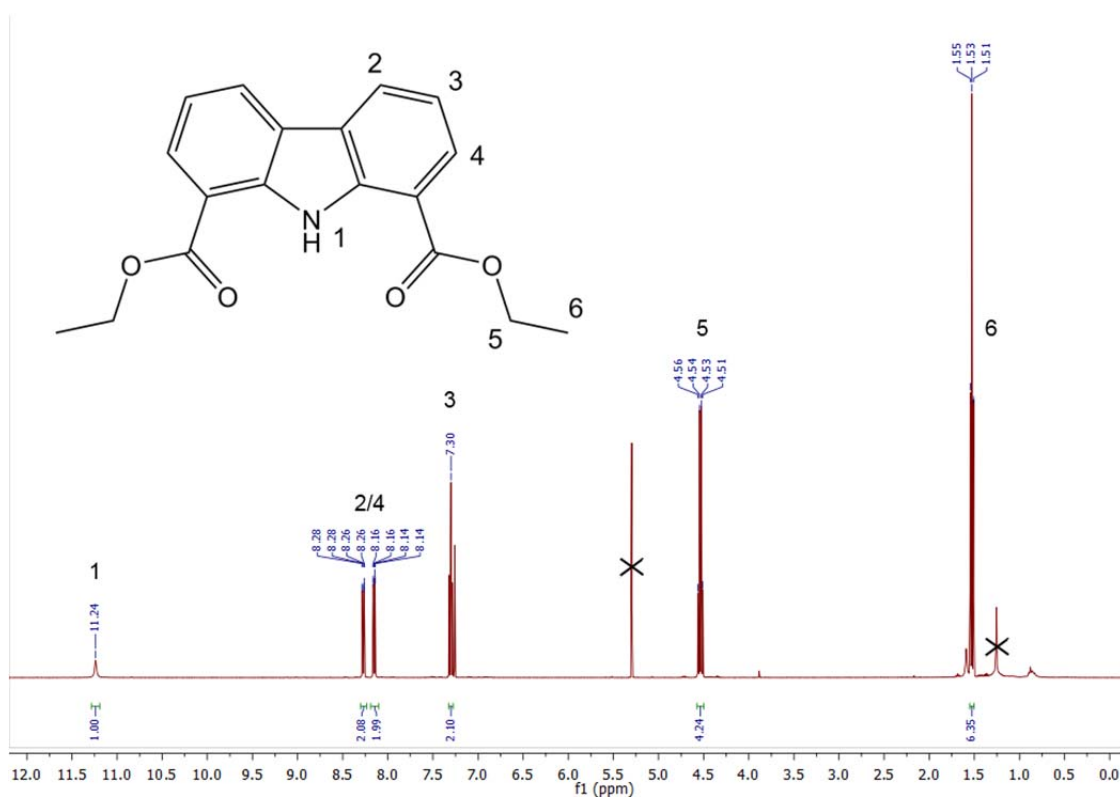

Figure S1: <sup>1</sup>H NMR spectrum (CDCl<sub>3</sub>, 293 K, 400 MHz) of 1,8-diethyl-dicarboxylate-carbazole

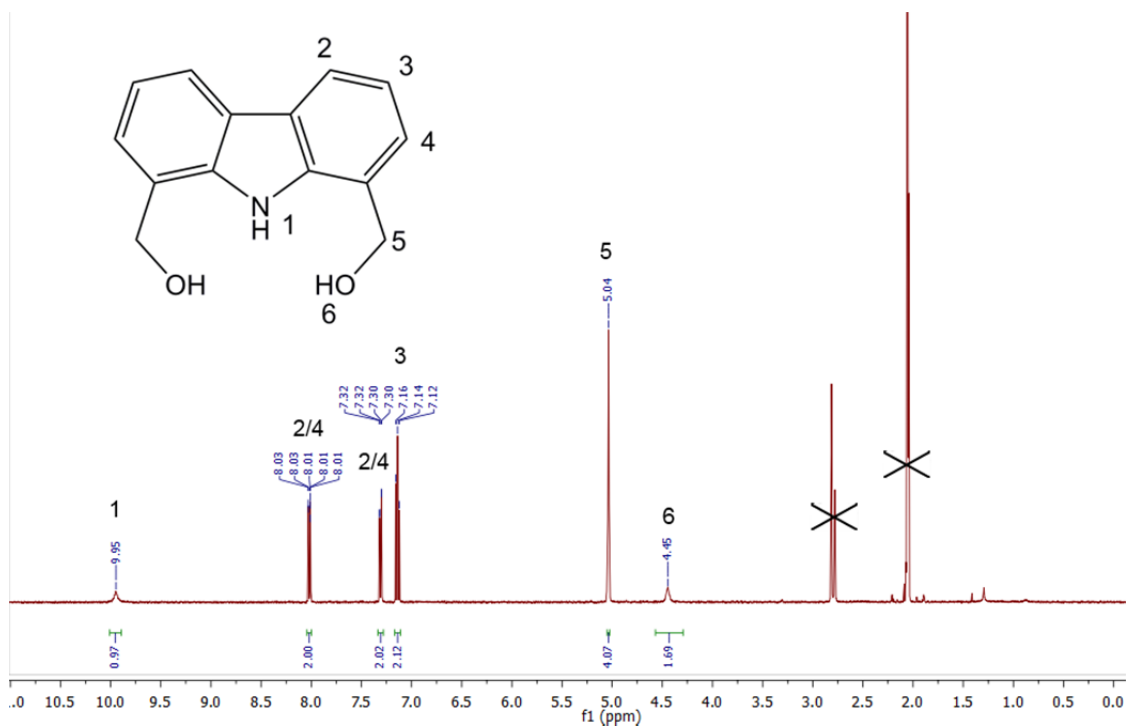

Figure S2: <sup>1</sup>H NMR spectrum ((CD<sub>3</sub>)CO), 293 K, 400 MHz) of 1,8-bis(hydroxymethyl)carbazole

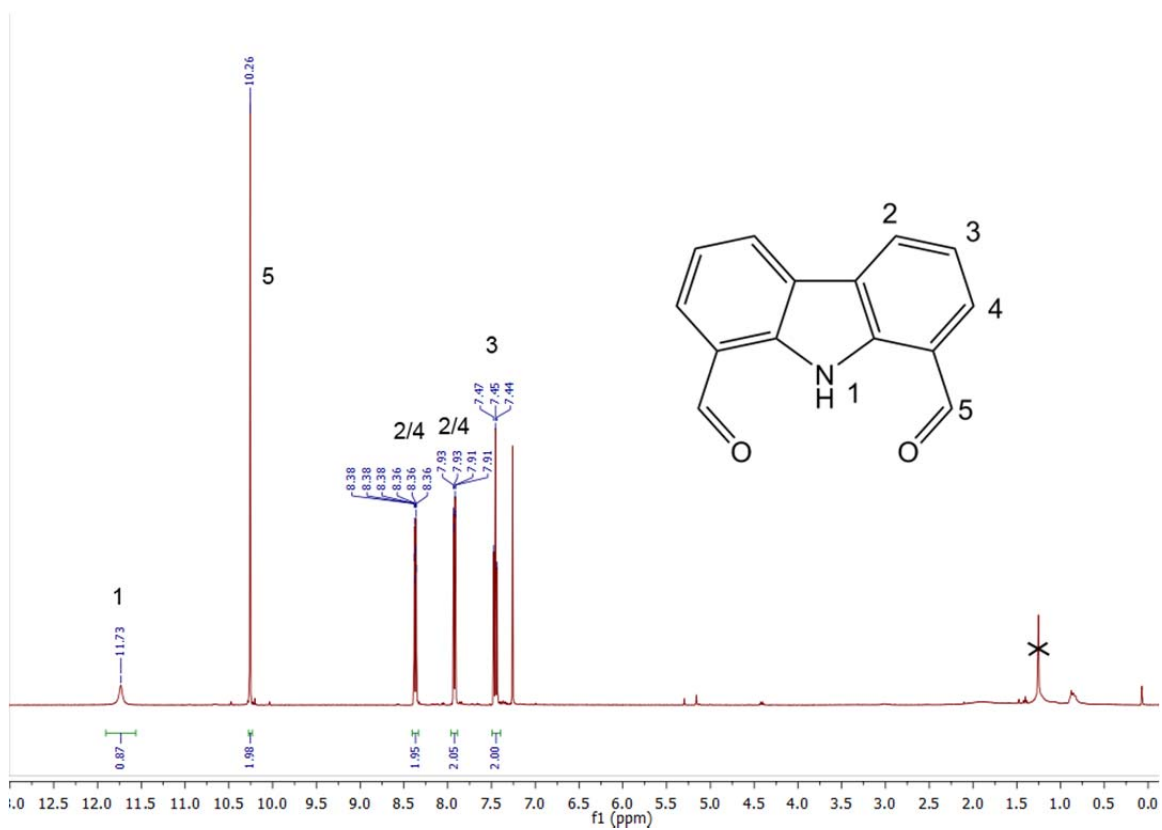

Figure S3: <sup>1</sup>H NMR spectrum (CDCl<sub>3</sub>, 293 K, 400 MHz) of 1,8-diformyl-carbazole

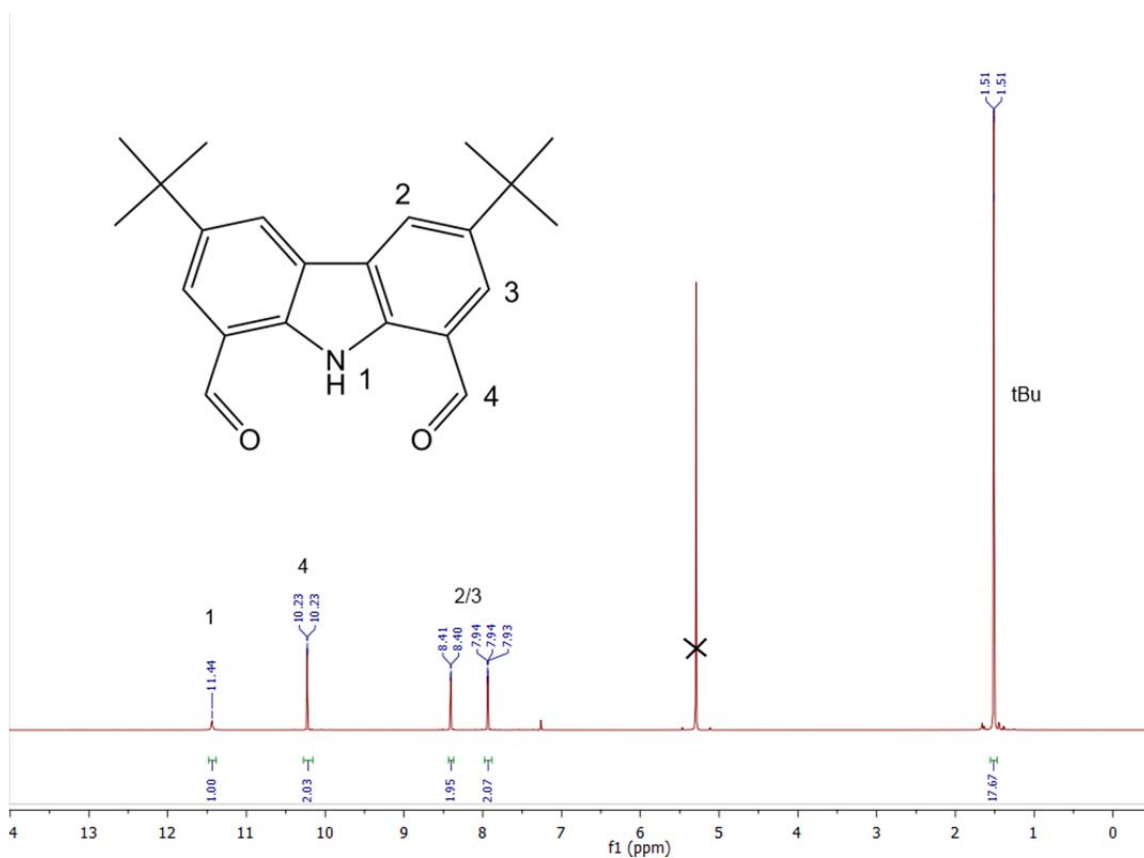

Figure S4:  $^1\text{H}$  NMR spectrum ( $\text{CDCl}_3$ , 293 K, 400 MHz) of 1,8-diformyl-3,6-di-tert-butyl-9H-carbazole

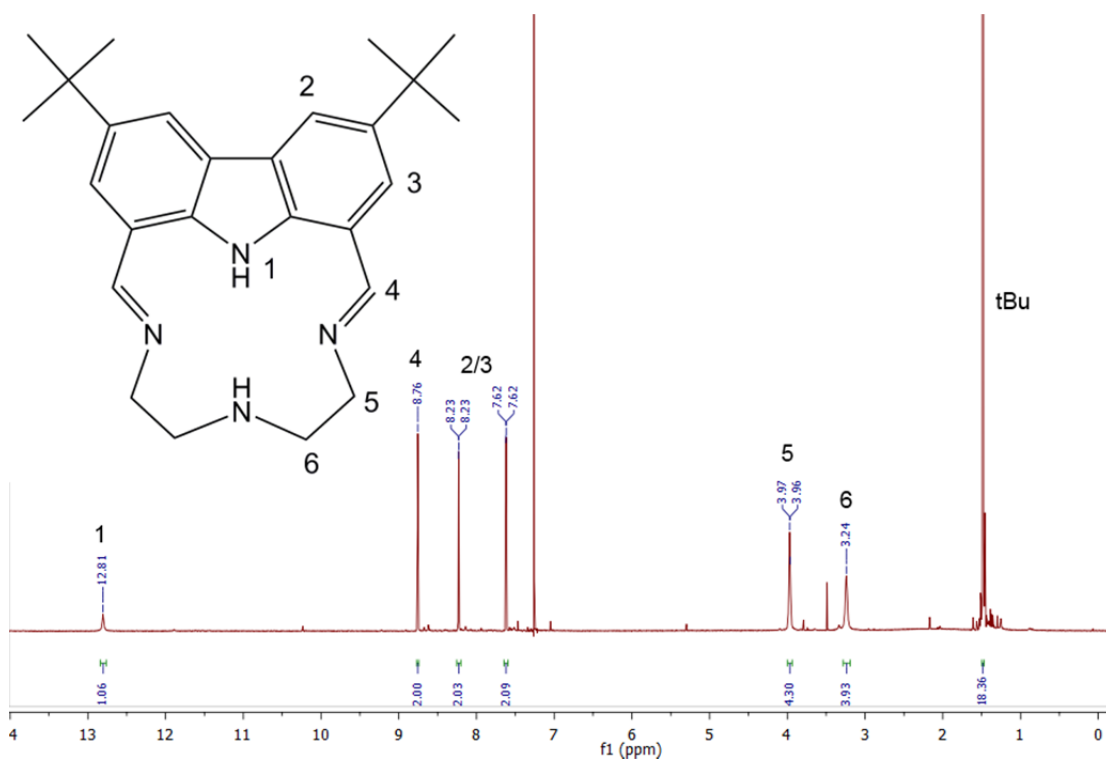

Figure S5:  $^1\text{H}$  NMR spectrum ( $\text{CDCl}_3$ , 293 K, 500 MHz) of HL<sup>tBu</sup>.

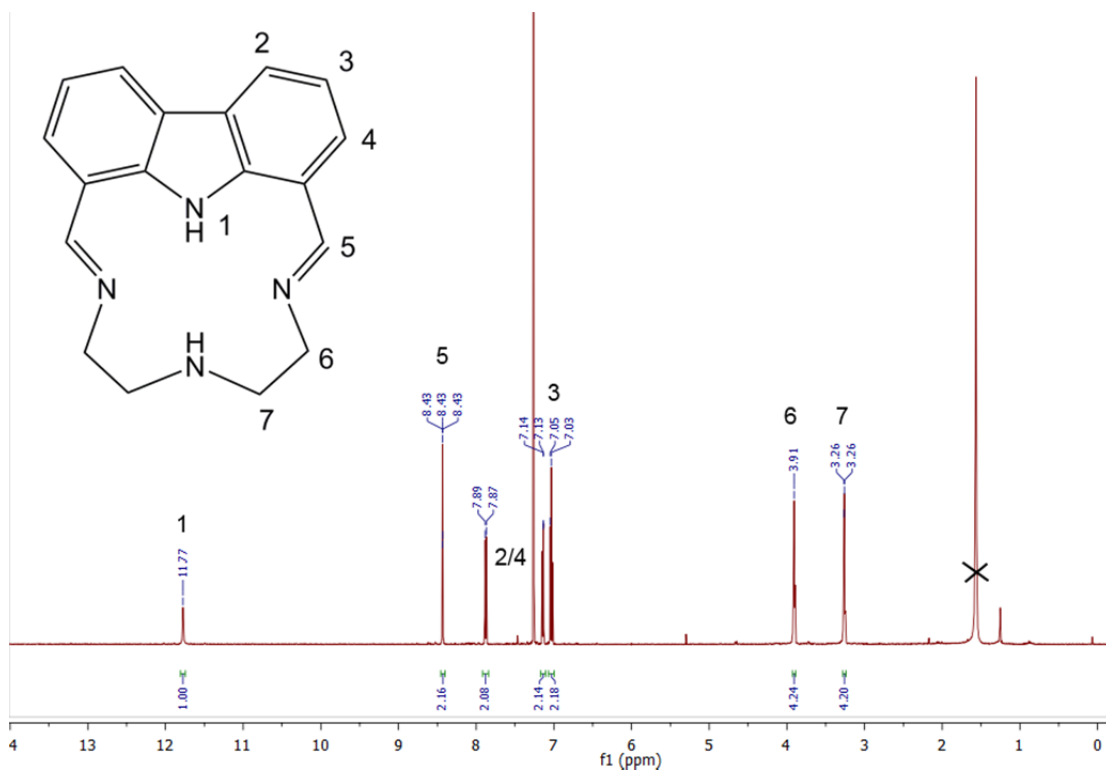

Figure S6:  $^1\text{H}$  NMR spectrum ( $\text{CDCl}_3$ , 293 K, 500 MHz) of  $\text{HL}^{\text{H}}$ .

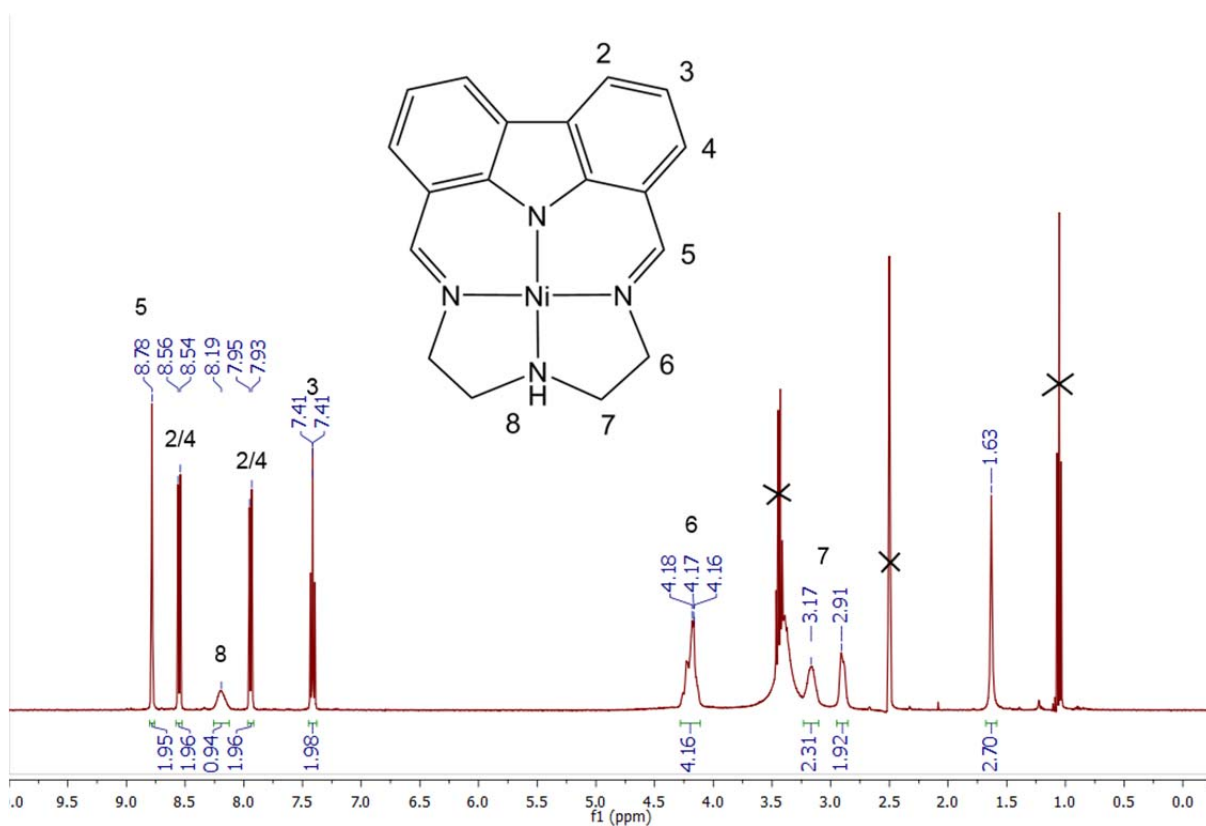

Figure S7:  $^1\text{H}$  NMR spectrum ( $(\text{CD}_3)_2\text{SO}$ , 293 K, 400 MHz) of  $[\text{NiL}^{\text{H}}]\text{OAc}$ .

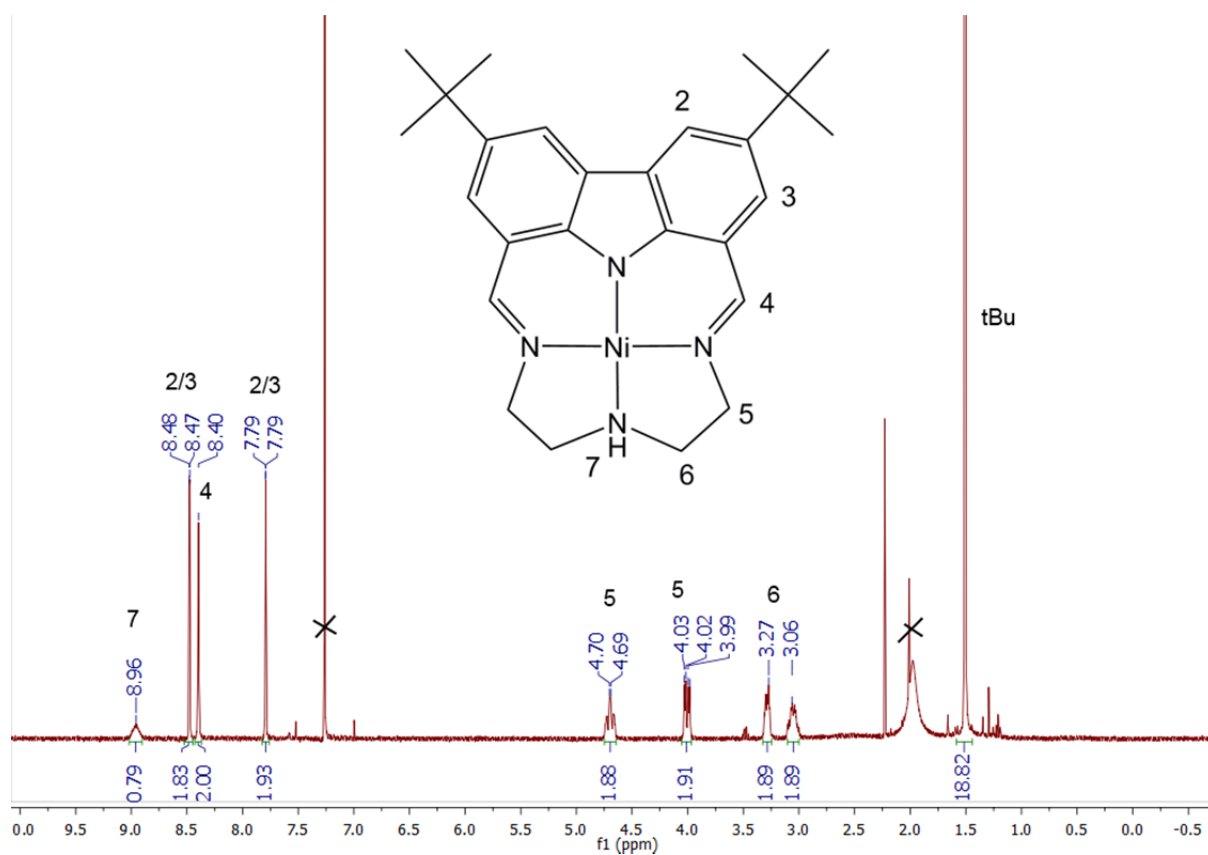

Figure S8: <sup>1</sup>H NMR spectrum (CDCl<sub>3</sub>, 293 K, 400 MHz) of [NiL<sup>tBu</sup>]OAc

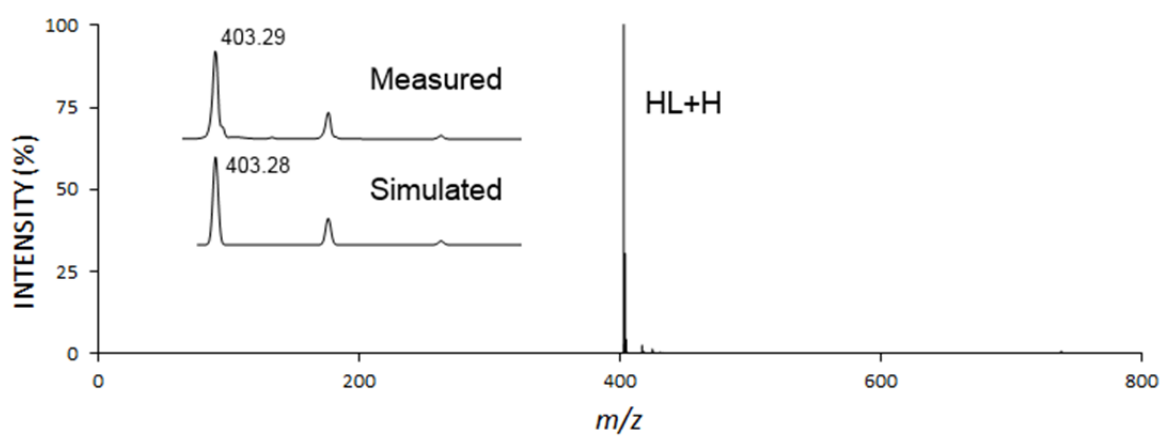

Figure S9: ESI(+) mass spectrum of HL<sup>tBu</sup>

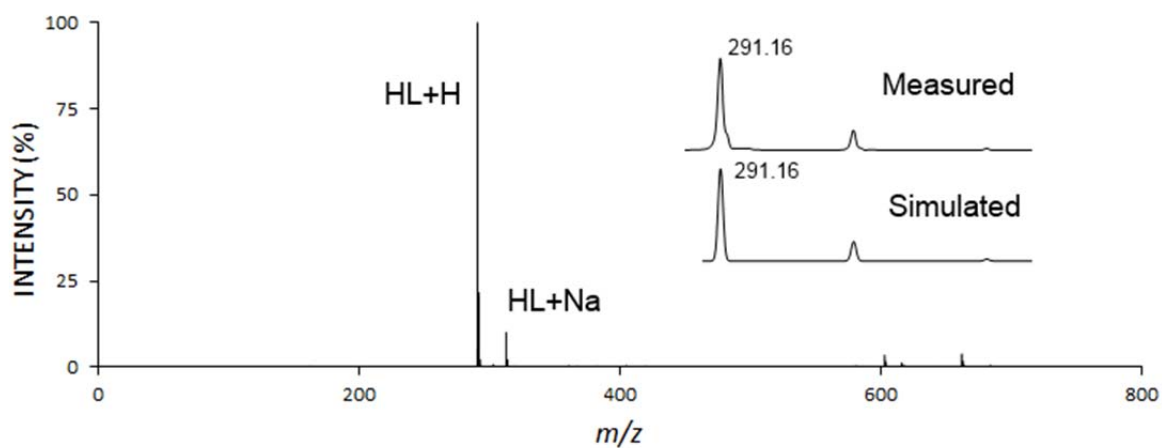

Figure S10: ESI(+)-mass spectrum of  $HL^H$

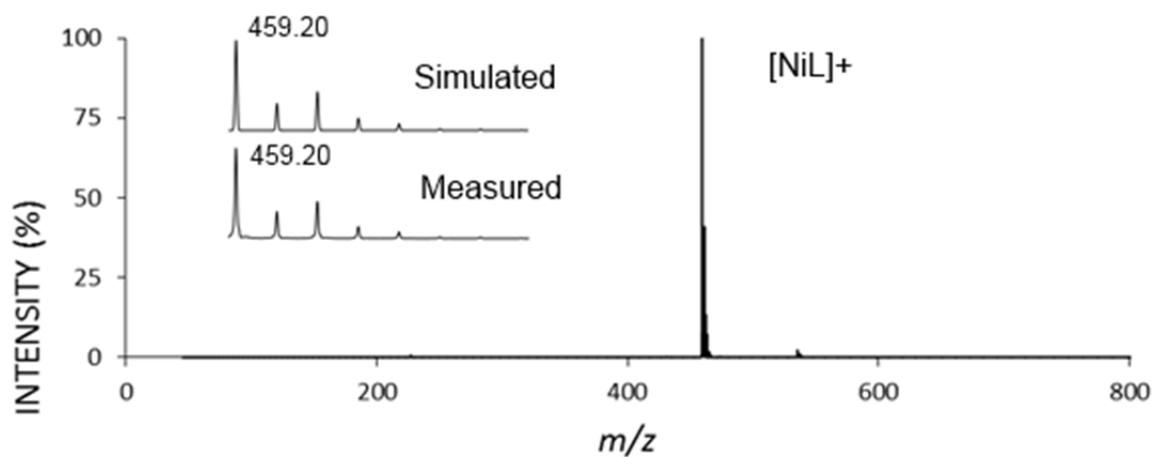

Figure S11: ESI(+)-mass spectrum of  $[NiL^{tBu}]OAc$ .

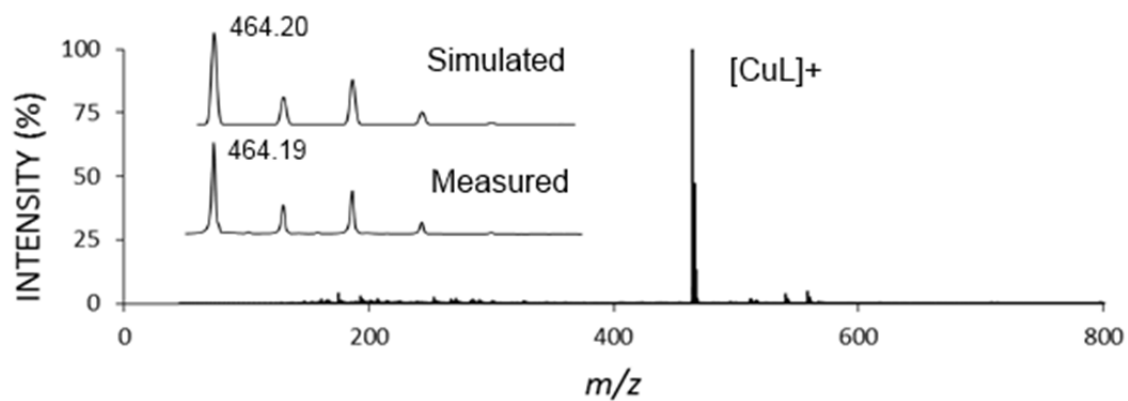

Figure S12: ESI(+)-mass spectrum of  $[CuL^{tBu}]OAc$ .



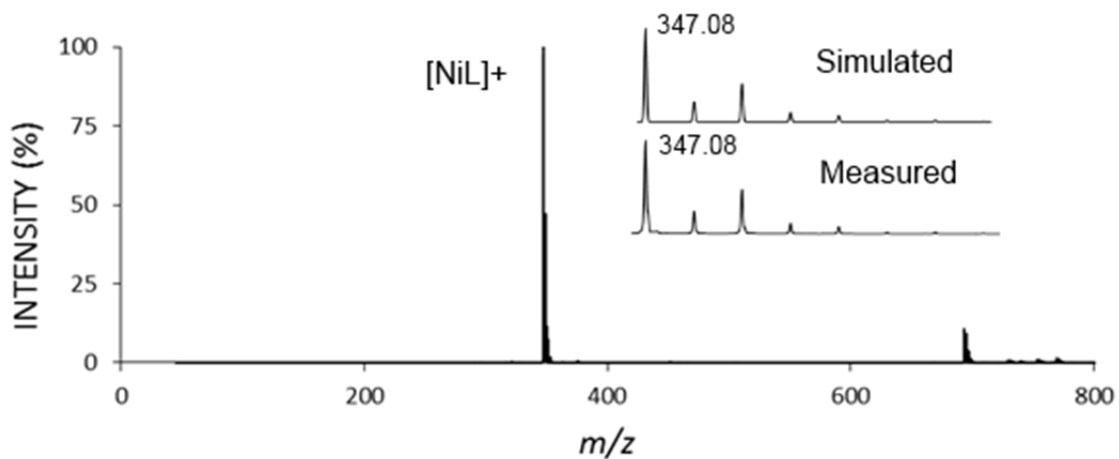

Figure S13: ESI(+) mass spectrum of  $[\text{NiL}^{\text{H}}]\text{OAc}$ .

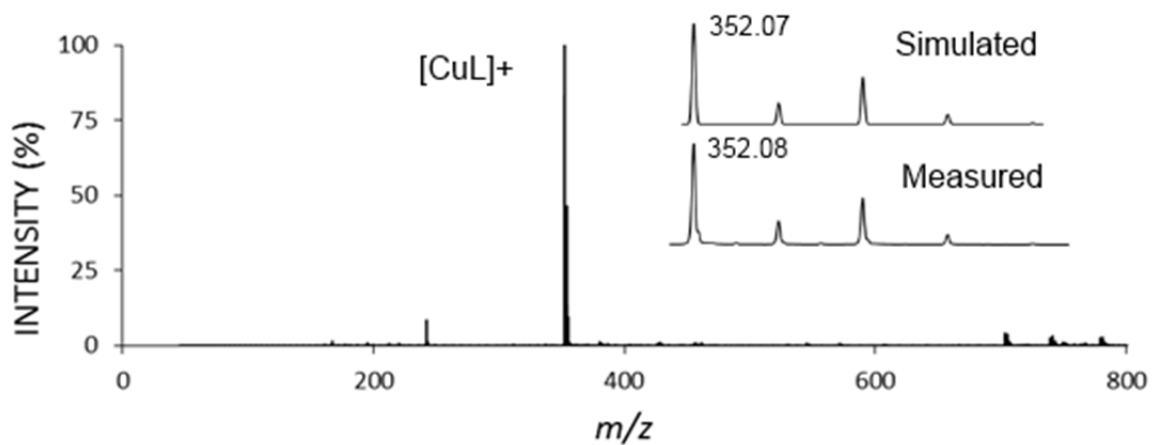

Figure S14: ESI(+) mass spectrum of  $[\text{CuL}^{\text{H}}]\text{OAc}$ .

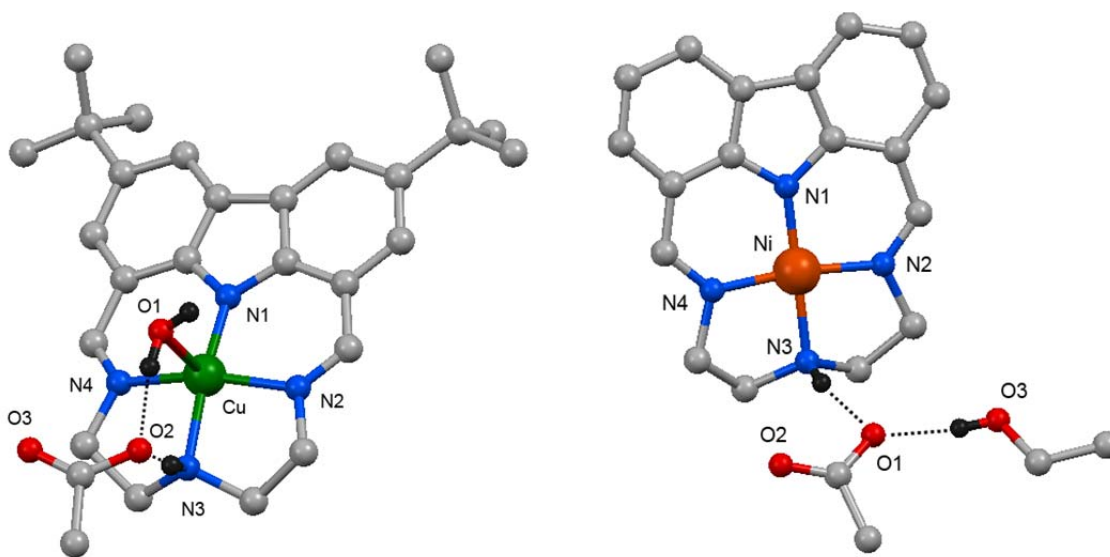

Figure S15 and S16: Hydrogen bonding interactions in the structures of  $[\text{CuL}^{\text{tBu}}(\text{H}_2\text{O})]\text{OAc}\cdot 0.5\text{Ether}$  (left) and  $[\text{NiL}^{\text{H}}]\text{OAc}\cdot \text{EtOH}$  (right).

Table S1. Crystal data and structure refinement for [CuL<sup>tbu</sup>(H<sub>2</sub>O)]OAc·0.5(Ether) and [NiL<sup>H</sup>]OAc·EtOH.

|                                         |                                                                     |                                                                  |
|-----------------------------------------|---------------------------------------------------------------------|------------------------------------------------------------------|
| Identification code                     | [CuL <sup>tbu</sup> (H <sub>2</sub> O)]OAc·0.5(Ether)               | [NiL <sup>H</sup> ]OAc·EtOH                                      |
| Empirical formula                       | C <sub>30</sub> H <sub>43</sub> Cu N <sub>4</sub> O <sub>3.50</sub> | C <sub>22</sub> H <sub>26</sub> N <sub>4</sub> Ni O <sub>3</sub> |
| Formula weight                          | 579.22                                                              | 453.18                                                           |
| Temperature                             | 83 K                                                                | 100 K                                                            |
| Wavelength                              | 0.71073 Å                                                           | 1.54184 Å                                                        |
| Crystal system                          | Monoclinic                                                          | Orthorhombic                                                     |
| Space group                             | P2 <sub>1</sub> /c                                                  | P 2 <sub>1</sub> 2 <sub>1</sub> 2 <sub>1</sub>                   |
| Unit cell dimensions                    | 15.2496(4) Å,<br>16.9526(5) Å<br>11.4962(3) Å<br>β = 98.699(2)°     | 6.6646(3) Å<br>12.9442(4) Å<br>23.1878(7) Å                      |
| Volume                                  | 2937.81(14) Å <sup>3</sup>                                          | 2000.37(11) Å <sup>3</sup>                                       |
| Z                                       | 4                                                                   | 4                                                                |
| Density (calculated)                    | 1.310 Mg/m <sup>3</sup>                                             | 1.505 Mg/m <sup>3</sup>                                          |
| Absorption coefficient                  | 0.782 mm <sup>-1</sup>                                              | 1.671 mm <sup>-1</sup>                                           |
| F(000)                                  | 1232                                                                | 952.0                                                            |
| Crystal size                            | 0.40 x 0.16 x 0.08 mm <sup>3</sup>                                  | 0.20 x 0.08 x 0.05 mm <sup>3</sup>                               |
| Theta range for data collection         | 1.81 to 26.35°                                                      | 5.09 to 76.13°                                                   |
| Index ranges                            | -19<=h<=19, -21<=k<=21,<br>-14<=l<=14                               | -8<=h<=5, -15<=k<=16,<br>-25<=l<=29                              |
| Reflections collected                   | 58913                                                               | 13219                                                            |
| Independent reflections                 | 5978 [R(int) = 0.0458]                                              | 4086 [R(int) = 0.0498]                                           |
| Completeness to theta =<br>26.00/76.29° | 100 %                                                               | 100 %                                                            |
| Absorption correction                   | Semi-empirical from<br>equivalents                                  | multi-scan                                                       |
| Max. and min. transmission              | 1.000 and 0.847                                                     | 1.000 and 0.69218                                                |
| Refinement method                       | Full-matrix least-squares on F <sup>2</sup>                         | Full-matrix least-squares on F <sup>2</sup>                      |
| Data / restraints / parameters          | 5978 / 18 / 386                                                     | 4086 / 22 / 331                                                  |
| Goodness-of-fit on F <sup>2</sup>       | 1.102                                                               | 1.226                                                            |
| Final R indices [I>2sigma(I)]           | R1 = 0.0422, wR2 = 0.1042                                           | R1 = 0.0887, wR2 = 0.2532                                        |
| R indices (all data)                    | R1 = 0.0649, wR2 = 0.1213                                           | R1 = 0.1005, wR2 = 0.2554                                        |
| Largest diff. peak and hole             | 1.216 and -0.566 e.Å <sup>-3</sup>                                  | 1.60 and -0.99 e.Å <sup>-3</sup>                                 |

### Cyclic Voltammetry - Full Scan rate studies

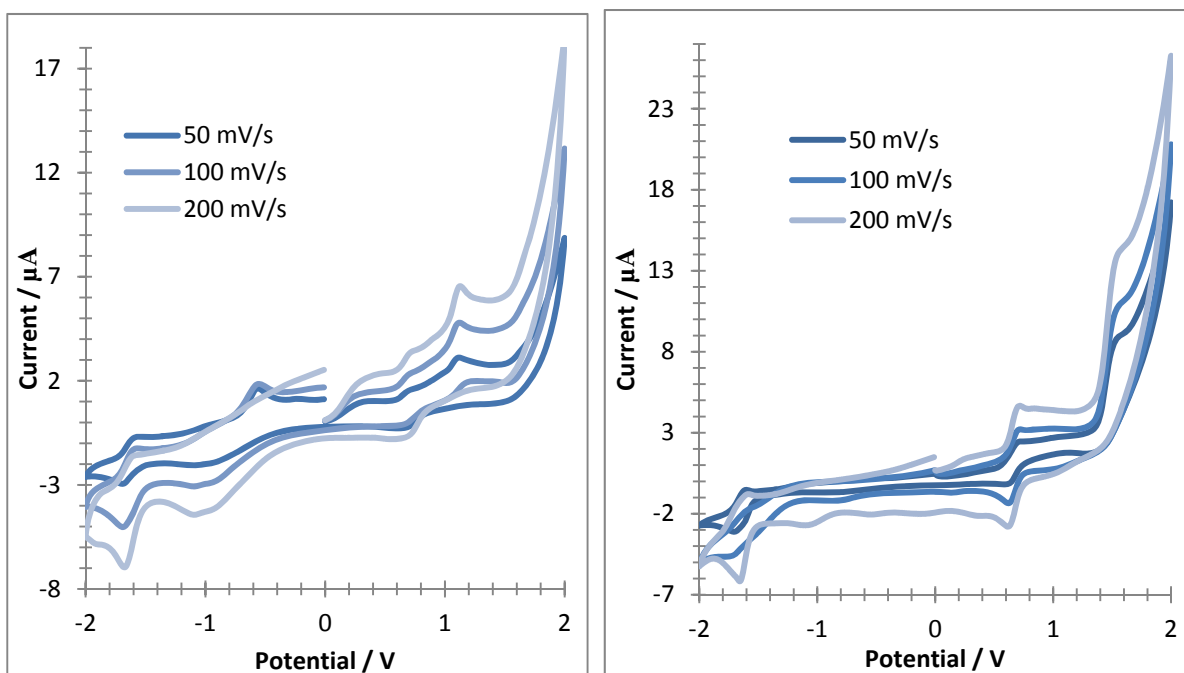

Figure S17 and S18: Full scan rate studies of [CuL<sup>H</sup>]OAc (left) and [CuL<sup>tBu</sup>]OAc (right) at speeds of 50, 100 and 200 mV/s, going 0 to 2 to -2V, in 0.1 molL<sup>-1</sup> NBu<sub>4</sub>PF<sub>6</sub> MeCN vs 0.01 molL<sup>-1</sup> AgNO<sub>3</sub>/Ag.

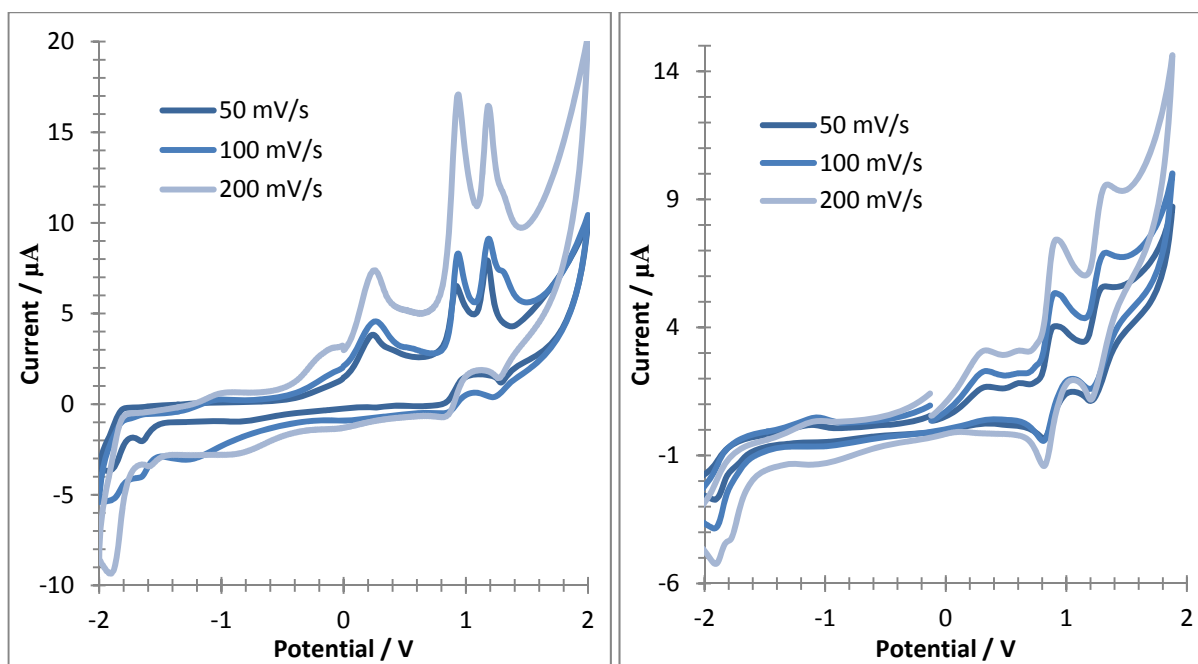

Figure S19 and S20: Full scan rate studies of [NiL<sup>H</sup>]OAc (left) and [NiL<sup>tBu</sup>]OAc (right) at speeds of 50, 100 and 200 mV/s, going 0 to 2 to -2V, in 0.1 molL<sup>-1</sup> NBu<sub>4</sub>PF<sub>6</sub> MeCN vs 0.01 molL<sup>-1</sup> AgNO<sub>3</sub>/Ag.

### Stack Plot

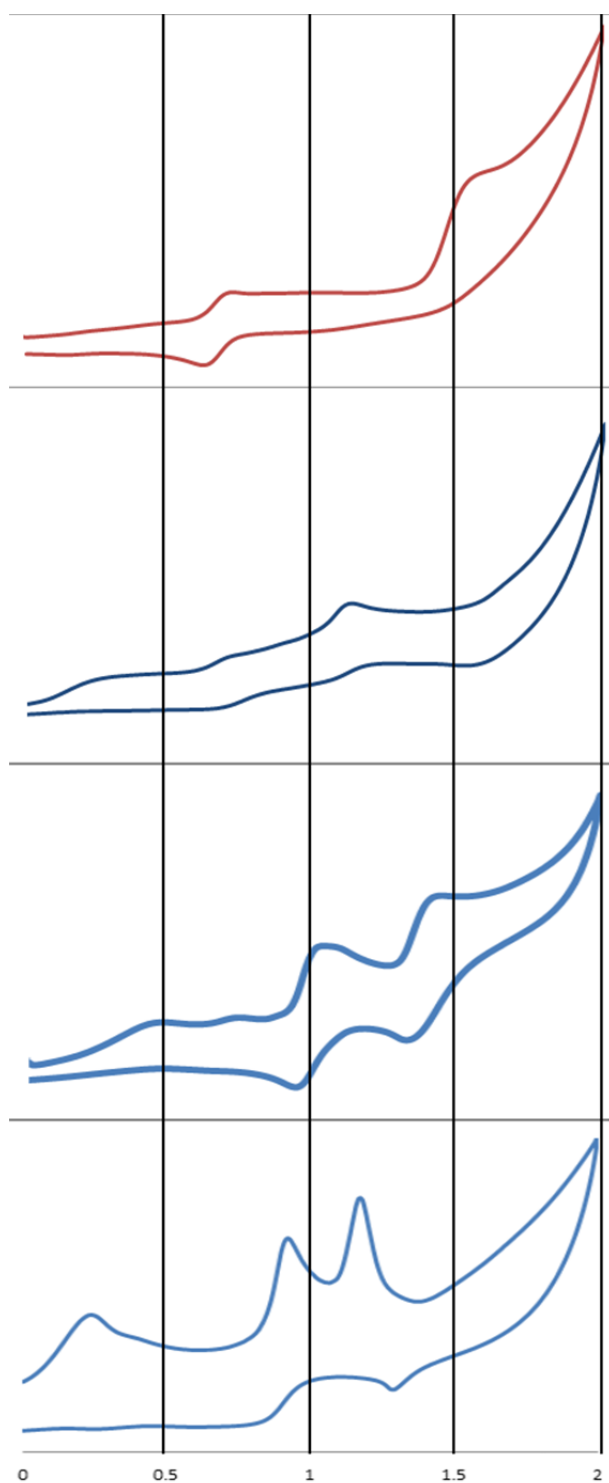

Figure S21: Stack plot of cyclic voltammograms of all four complexes, from 0 to 2V at 100 mV/s in 0.1 molL<sup>-1</sup> NBu<sub>4</sub>PF<sub>6</sub> MeCN vs 0.01 molL<sup>-1</sup> AgNO<sub>3</sub>/Ag. Top: [CuL<sup>tBu</sup>]OAc, top middle: [CuL<sup>H</sup>]OAc, bottom middle: [NiL<sup>tBu</sup>]OAc, bottom: [NiL<sup>H</sup>]OAc

### Other Scan Rate studies

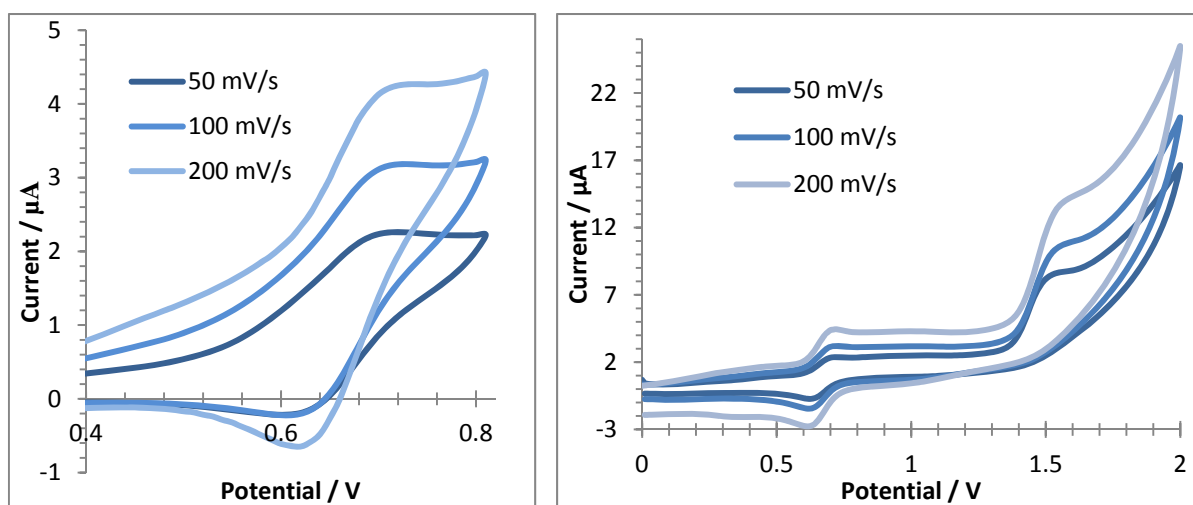

Figure S22 and S23: Scan rate study of [CuL<sup>tBu</sup>]OAc, from 0 to 0.8 V (left) and from 0 to 2 V (right), in 0.1 molL<sup>-1</sup> NBu<sub>4</sub>PF<sub>6</sub> MeCN vs 0.01 molL<sup>-1</sup> AgNO<sub>3</sub>/Ag.

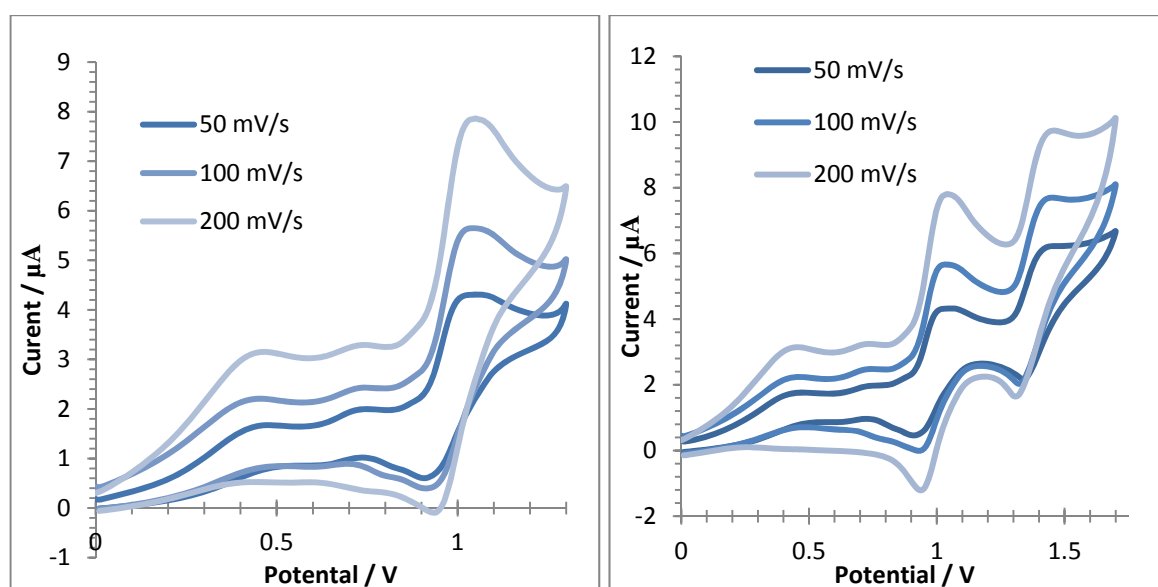

Figure S24 and S25: Scan rate study of [NiL<sup>tBu</sup>]OAc, from 0 to 1.3 V (left) and from 0 to 1.7 V (right), in 0.1 molL<sup>-1</sup> NBu<sub>4</sub>PF<sub>6</sub> MeCN vs 0.01 molL<sup>-1</sup> AgNO<sub>3</sub>/Ag.

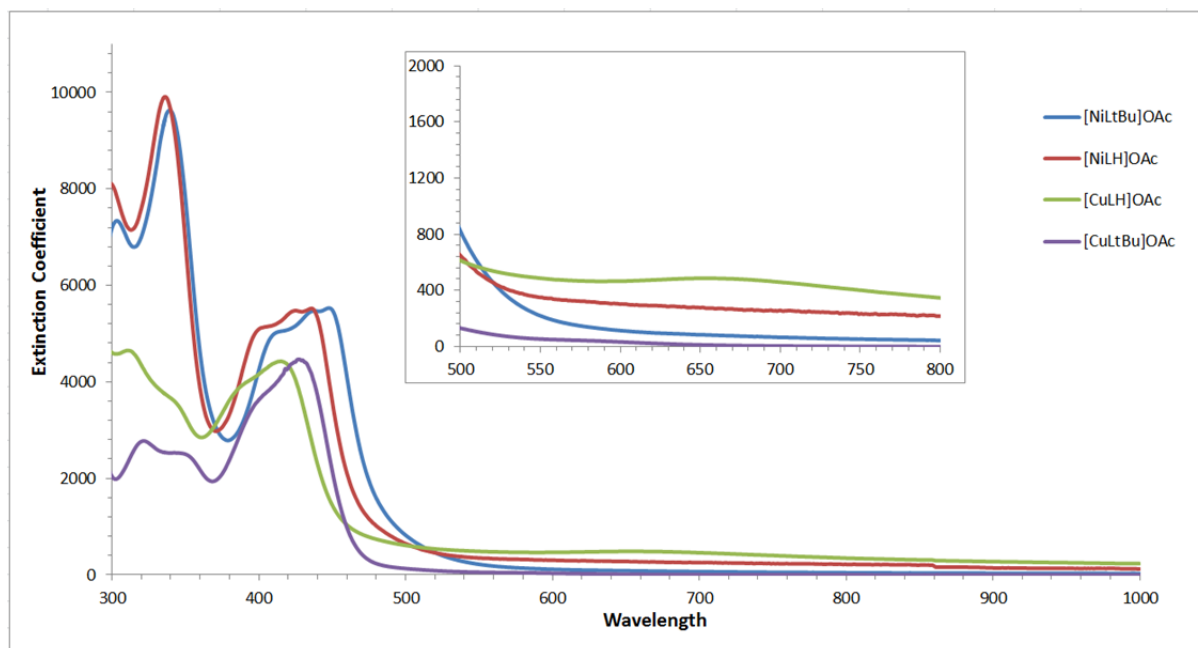

Figure S26: UV-vis spectra in MeCN at 0.25 mmolL<sup>-1</sup> for [CuL<sup>H</sup>(H<sub>2</sub>O)]OAc, [CuL<sup>t</sup>Bu(H<sub>2</sub>O)]OAc, [NiL<sup>H</sup>]OAc and [NiL<sup>t</sup>Bu]OAc (colour). Inset 500-800nm window.

## References

1. Sheldrick, G. M.; Schneider, T. R., SHELXL. *Methods in Enzymology* **1997**, *277*, 319-343.
2. CrysAlisPro *CrysAlisPro*, Agilent Technologies Yarnton, Oxfordshire, CrysAlisPro.
3. Palatinus, L.; Chapuis, G., SUPERFLIP. A computer program for the solution of crystal structures by charge flipping in arbitrary dimensions. *J. Appl. Crystallogr.* **2007**, *40* (4), 786-790.
4. Sheldrick, G., Crystal structure refinement with SHELXL. *Acta Crystallogr., Sect. C: Cryst. Struct. Commun.* **2015**, *71* (1), 3-8.
5. Smith, K.; James, D. M.; Mistry, A. G.; Bye, M. R.; Faulkner, D. J., A new method for bromination of carbazoles,  $\beta$ -carbolines, and imidodibenzyls by use of N-bromosuccinimide and silica gel. *Tetrahedron* **1992**, *48*, 7479-7488.
6. Gibson, V. C.; Spitzmesser, S. K.; White, A. J. P.; Williams, D. J., Synthesis and reactivity of 1,8-bis(imino)carbazolide complexes of iron, cobalt and manganese. *Dalton Trans.* **2003**, *13*, 2718-2727.
